# Supplementary material for: Experimental-data-driven thermal conductivity prediction and inverse composition design for alloys
Source: Royal Society of Chemistry journal article supplement (doi:10.1039/d6ra01983h), 2026-05-27
Supplement: d6ra01983h1.pdf [file d6ra01983h1.pdf]

## Supplementary Information

### Experimental-Data–Driven Thermal Conductivity Prediction and Inverse Composition Design for Alloys

Anh D. Phan,<sup>1,2,\*</sup> Vu Bich Hanh,<sup>3</sup> Ngo T. Que,<sup>1</sup> Nguyen T. T. Duyen,<sup>3</sup> Do T. Nga,<sup>4</sup> and Baicheng Mei<sup>5</sup>

<sup>1</sup>Center for Materials Innovation and Technology, VinUniversity, Hanoi 100000, Vietnam

<sup>2</sup>College of Engineering and Computer Science, VinUniversity, Hanoi 100000, Vietnam

<sup>3</sup>Faculty of Materials Science and Engineering, Phenikaa University, Hanoi 12116, Vietnam

<sup>4</sup>Institute of Physics, Vietnam Academy of Science and Technology, 10 Dao Tan, Giang Vo, Hanoi 100000, Vietnam

<sup>5</sup>School of Materials Science and Engineering, Beijing Institute of Technology, Beijing 100081, China

| Alloy                                                                             | Ref                              |
|-----------------------------------------------------------------------------------|----------------------------------|
| Pt                                                                                | 10.1016/S0925-8388(98)01012-1    |
| Pt-Ni                                                                             |                                  |
| Al-Si-Fe-Cu-Ni-Zn                                                                 | 10.1007/s10853-015-9115-9        |
| Al-Cu, Au-Ag, Fe-Ni<br>Cu-Zn, Ag-Pd, Ag-Pd<br>Cu-Pd, Al-Mg, Cu-Ni<br>Cu-Pd, Cu-Au | 10.1063/1.555583                 |
| Co-Ni                                                                             | 10.1016/j.jmst.2020.04.045       |
| Al-Si-Mn-Mg-Fe-Ti-Sr-Ni-Cr-Cu-Zn-Zr                                               | 10.3390/ma17125329               |
| Ti-Al-V-Mo-Cr-Zr-Fe-C-O-N                                                         | 10.1134/S0031918X14050020        |
| Cu-Cr-Zr-Ti-Fe                                                                    | 10.5402/2012/580654              |
| Mg-Zn-Mn                                                                          | 10.1016/j.jallcom.2013.03.184    |
| Mg-Mn-Fe-Si                                                                       | 10.1016/j.jallcom.2015.11.107    |
| Al-Si-Fe-Cu-Ni-Zn                                                                 | 10.1007/s10853-015-9115-0        |
| Fe-Al                                                                             | 10.2355/isijinternational.42.322 |
| Al-Fe, Al-Fe-Ce                                                                   | 10.1016/S1003-6326(22)65908-9    |
| Co-Sb-S-Se                                                                        | 10.1038/srep46630                |
| Al, Cu, Ag, Au, W, Mo, Ni<br>Fe, Pt, Pd, Y, Mg, Ti, Cr, Co, Sn                    | NIST NSRDS 8 (PDF)               |
| Al-Cu, Al-Si                                                                      | 10.1016/j.acta.2016.01.019       |
| Ag-Bi-Sn                                                                          | 10.1016/j.tca.2022.179344        |
| Al-Fe, Al-Si, Al-Si-Fe                                                            | 10.1007/s10962-021-00580-0       |
| Ag-Si                                                                             | 10.1016/j.jpms.2021.109997       |
| Bi-Ag                                                                             | 10.1007/s10973-020-10482-8       |
| Mg-La-Zr                                                                          | 10.1016/j.jallcom.2017.10.013    |

|                                                                                              |                                 |
|----------------------------------------------------------------------------------------------|---------------------------------|
| Pb-Li                                                                                        | 10.1016/j.fusengdes.2015.12.029 |
| Na-Sn-Bi-Te                                                                                  | 10.1021/jacs.0c05650            |
| W-Re                                                                                         | 10.1016/S0167-577X(02)01403-9   |
| Pt-Ni                                                                                        | 10.1016/S0925-8388(98)01012-1   |
| Mg-Al                                                                                        | 10.1007/s10765-013-1490-3       |
| Mg-Al, Mg-Sn, Mg-Zr<br>Mg-Mn, Mg-Ca                                                          | 10.1007/s10853-013-8012-3       |
| Al-Gd-Cu, Al-Gd-Ni, Al-Gd-Mn<br>Al-Gd-Co, Al-Gd-Fe, Al-Gd-Ta<br>Al-Gd-Zr, Al-Gd-Mo, Al-Gd-Ti | 10.1016/S1003-6326(15)63798-0   |
| Zr-Hf-Ni-Sn-Sb                                                                               | 10.1039/C5TA04184A              |
| Zr-Ni-Sn, Ti-Ni-Sn<br>Zr-Ti-Ni-Sn, Hf-Ti-Ni-Sn                                               | 10.1038/s41598-017-14013-8      |

Table SII: Summary of the optimized hyperparameters for different machine-learning models.

| Model             | Hyperparameters                                                     |
|-------------------|---------------------------------------------------------------------|
| Extra Trees       | max depth=None; min samples split=2; n estimators=300               |
| CatBoost          | depth=8; iterations=800; 12 leaf reg=1; learning rate=0.1           |
| XGBoost           | max depth=7; learning rate=0.1; subsample=0.8; colsample bytree=1.0 |
| Random Forest     | max depth=None; min samples split=2; n estimators=500               |
| Gradient Boosting | max depth=4; learning rate=0.1; n estimators=500                    |
| Decision Tree     | max depth=None; min samples split=2                                 |

Table SIII: Performance comparison of machine-learning models using the extended 181-feature descriptor set.

| Model             | R <sup>2</sup> (%) train | RMSE train | R <sup>2</sup> (%) train | RMSE train |
|-------------------|--------------------------|------------|--------------------------|------------|
| CatBoost          | 99.96                    | 1.68       | 98.89                    | 9.91       |
| Extra Trees       | 99.99                    | 0.73       | 98.77                    | 10.50      |
| XGBoost           | 99.96                    | 1.76       | 98.01                    | 13.33      |
| Random Forest     | 99.81                    | 3.93       | 97.75                    | 14.18      |
| Gradient Boosting | 99.64                    | 5.41       | 97.71                    | 14.31      |
| Decision Tree     | 99.99                    | 0.73       | 95.74                    | 19.52      |

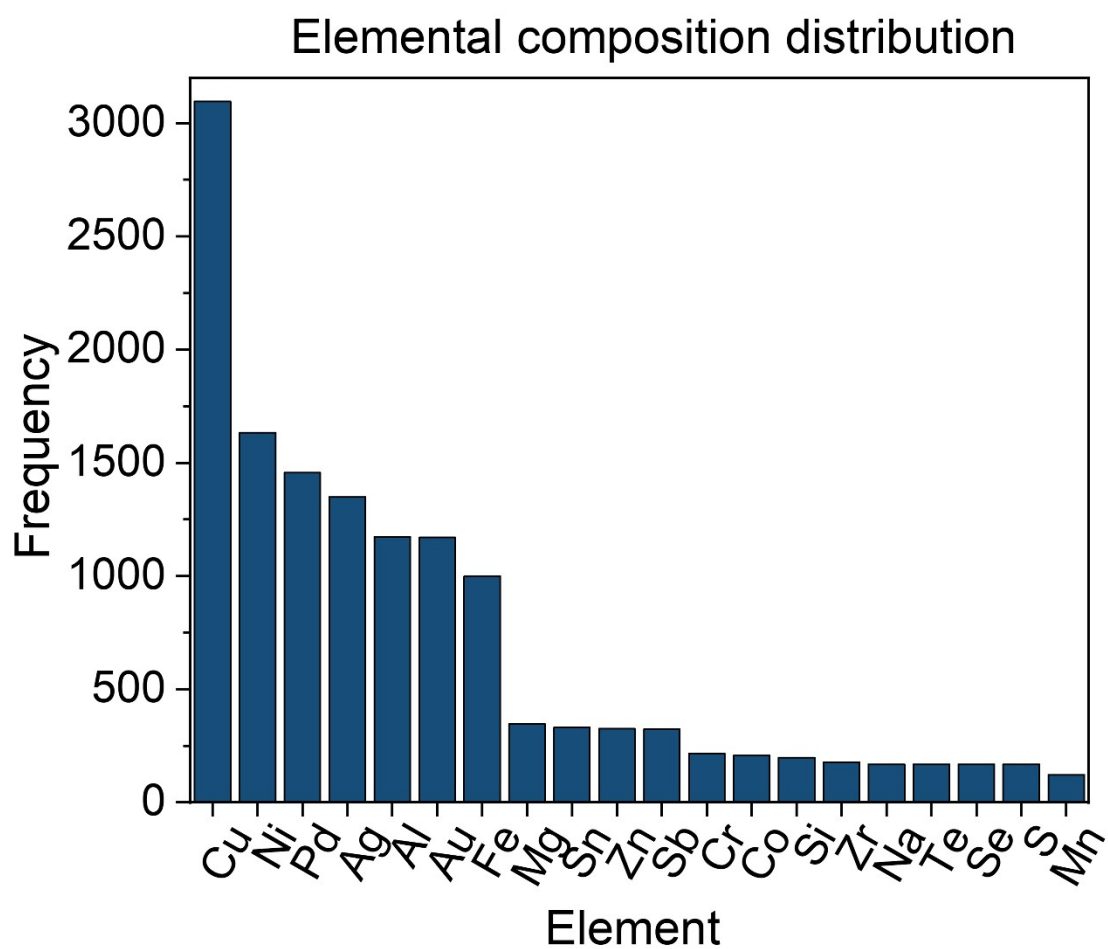

Figure S1: (Color online) Top 20 most common elements in the dataset and their occurrence frequencies
